# Supplementary material for: Toxicity and mechanistic analysis of Di(2- ethylhexyl)phthalate in renal cell carcinoma Progression: a systematic study with network toxicology and molecular docking strategies
Source: Research Square preprint supplement (doi:10.21203/rs.3.rs-5804717/v1), 2025-04-28
Supplement: Supplementary file 1 [file 12a5dbab939200723a3f5341.docx]

**Comprehensive Abbreviations and Full Names List**

DEHP: Di(2-ethylhexyl) phthalate

RCC: Renal Cell Carcinoma

MEHP: Mono(2-ethylhexyl) phthalate

MEHHP: Mono-(2-ethyl-5-hydroxyhexyl) phthalate

PPARα: Peroxisome Proliferator-Activated Receptor Alpha

EFSA: European Food Safety Authority

IARC: International Agency for Research on Cancer

PCa: Prostate Cancer

BCa: Bladder Cancer

GO: Gene Ontology

BP: Biological Processes

CC: Cellular Components

MF: Molecular Functions

KEGG: Kyoto Encyclopedia of Genes and Genomes

PPI: Protein-Protein Interaction

DAVID: Database for Annotation, Visualization, and Integrated Discovery

CASP3: Caspase 3

MMP9: Matrix Metallopeptidase 9

BCL2: B-cell lymphoma 2

BCL2L1: BCL2-like 1

CTSS: Cathepsin S

APP: Amyloid Beta Precursor Protein

DOP: Dioctyl Phthalate

PDB: Protein Data Bank

CB-DOCK2: A tool used for molecular docking

LD50: Median Lethal Dose

ADMET: Absorption, Distribution, Metabolism, Excretion, and Toxicity

VEGF: Vascular Endothelial Growth Factor

VHL: Von Hippel-Lindau

BAP1: BRCA1-associated Protein-1

mTOR: Mechanistic Target of Rapamycin

PI3K/AKT: Phosphoinositide 3-kinase / Protein Kinase B Pathway

ARC: Apoptosis Repressor with CARD Domain

ERK: Extracellular Signal-Regulated Kinase

MAPK: Mitogen-Activated Protein Kinase

CKD: Chronic Kidney Disease

ESRD: End-Stage Renal Disease

SHH: Sonic Hedgehog

CB-Dock: A docking program for small molecule and protein interaction prediction

FDR: False Discovery Rate

STRING: Search Tool for the Retrieval of Interacting Genes/Proteins

FUMA: Functional Mapping and Annotation

AD-METlab 2.0: Absorption, Distribution, Metabolism, Excretion, and Toxicity Laboratory version 2.0

Vnn-ADMET: Vnn Absorption, Distribution, Metabolism, Excretion, and Toxicity

CH11: Anti-Fas Antibody CH11

SMILE: Simplified Molecular Input Line Entry System

RStudio: Integrated Development Environment for R programming

SwissTarget Prediction: Prediction tool for bioactive molecule targets

ChEMBL: Database of bioactive molecules

PSCA: Prostate Stem Cell Antigen

VEGFR: Vascular Endothelial Growth Factor Receptor

TRP: Transient Receptor Potential

TNF: Tumor Necrosis Factor

LNCaP: Lymph Node Carcinoma of the Prostate

RCSB: Research Collaboratory for Structural Bioinformatics

ProTox-II: Prediction tool for toxic effects of chemicals

NTP-CERHR: National Toxicology Program - Center for Evaluation of Risks to Human Reproduction

Wnt/β-catenin: Wnt Signaling Pathway / β-catenin Protein Pathway

ERK5: Extracellular Signal-Regulated Kinase 5

CYP: Cytochrome P450

VEGFR-3: Vascular Endothelial Growth Factor Receptor-3

TGF-β: Transforming Growth Factor Beta

NF-κB: Nuclear Factor Kappa-light-chain-enhancer of Activated B Cells

BCL-xl: B-cell lymphoma-extra large

Akt: Protein Kinase B

MEK: Mitogen-Activated Protein Kinase Kinase

BACE1: Beta-Site Amyloid Precursor Protein Cleaving Enzyme 1

AMPK: AMP-activated Protein Kinase

Mcl-1: Myeloid Cell Leukemia-1

TRAIL: TNF-Related Apoptosis-Inducing Ligand

CCL: Cytokine-Chemokine Ligand

ADMETlab 2.0: In silico tool for ADMET prediction

VEGF-C: Vascular Endothelial Growth Factor-C

VEGF-D: Vascular Endothelial Growth Factor-D

ABT-737: BCL2 inhibitor

PI3K: Phosphoinositide 3-kinase

BCL2L11: BCL2-like 11

LFA-1: Lymphocyte Function-associated Antigen 1

cAMP: Cyclic Adenosine Monophosphate

FGFR: Fibroblast Growth Factor Receptor

PPARG: Peroxisome Proliferator-Activated Receptor Gamma

Akt/mTOR: Protein Kinase B / Mechanistic Target of Rapamycin

TCA: Tricarboxylic Acid Cycle

ROS: Reactive Oxygen Species

NADPH: Nicotinamide Adenine Dinucleotide Phosphate

ATP: Adenosine Triphosphate

RIPK: Receptor-Interacting Serine/Threonine-Protein Kinase

BCL2L11 (BIM): BCL2 Interacting Mediator of Cell Death
