# Supplementary material for: Toxicity and mechanistic analysis of Di(2- ethylhexyl)phthalate in renal cell carcinoma Progression: a systematic study with network toxicology and molecular docking strategies
Source: Research Square preprint supplement (doi:10.21203/rs.3.rs-5804717/v1), 2025-04-28
Supplement: Supplementary file 3 [file 706a6996071ebaf471b0fe5e.docx]

**Highlights**

1.Applied network toxicology and molecular docking to analyze the putative toxicity of Di(2-ethylhexyl) phthalate (DEHP) on Renal cell carcinoma (RCC).

2.Uncover core targets and key pathways for DEHP-induced renal cell carcinoma toxicology.

3.Promote network toxicology and molecular docking technique for efficient evaluations of toxicity and underlying molecular mechanisms of emergent environmental chemicals.
