# Supplementary material for: Toxicity and mechanistic analysis of Di(2- ethylhexyl)phthalate in renal cell carcinoma Progression: a systematic study with network toxicology and molecular docking strategies
Source: Research Square preprint supplement (doi:10.21203/rs.3.rs-5804717/v1), 2025-04-28
Supplement: Supplementary file 4 [file 97ed21c1c513a1f4a866939c.docx]

**Appendix A. Website URLs for database and tools used in present study.**

| Program | Database | Website URL |
| --- | --- | --- |
| Biotoxicity prediction | ProTox-II | https://tox.charite.de/protox3/index.php?site=home |
| ADMETlab 2.0 | https://admetmesh.scbdd.com/ |
| Vnn-ADMET | https://vnnadmet.bhsai.org/vnnadmet/about.xhtml |
| Collection targets | PubChem | https://pubchem.ncbi.nlm.nih.gov/ |
| ChEMBL | http://www.ebi.ac.uk/chembl/ |
| STITCH | http://stitch.embl.de/cgi/input.pl/ |
| SWISS | http://swisstargetprediction.ch/ |
| Venn diagram |  | https://jvenn.toulouse.inrae.fr/app/example.html |
| Protein interaction network | STRING | https://STRINGdb.org/ |
| Cytoscape | https://cytoscape.org |
| Enrichment analysis | DAVID | https://david.ncifcrf.gov/ |
| FUMA | https://fuma.ctglab.nl/ |
| R version 4.4.1 | https://www.r-project.org/ |
| Molecular docking | GeneCards | http://www.genecards.org/ |
| Uniprot | https://www.uniprot.org/ |
| RCSB PDB | https://www.rcsb.org |
| Pymol | https://www.pymol.org |
| CB-Dock2 | https://cadd.labshare.cn/cb-dock2/index.php |
| Autodock | https://autodock.scripps.edu/ |

**Appendix B. Potential targets of DEHP-induced renal cell carcinoma toxicity.**

| PIK3CA | MCL1 | KCNN4 | CAPN1 | GRM5 | GRM4 |
| --- | --- | --- | --- | --- | --- |
| TERT | PRKCD | ELANE | MAPK11 | TRPC3 | TRPA1 |
| BCL2 | PRKCA | PTPN1 | BCL2L2 | KCNA5 | SLC6A9 |
| ACE | MMP7 | P2RX7 | CTSS | PTAFR | PDE10A |
| AR | BAD | CTSL | ADORA2A | PTGDR2 | TDO2 |
| CASP3 | TNFRSF1A | VCP | ADORA1 | PDE5A | MTNR1A |
| MMP9 | SLC2A2 | TRPV4 | PTGER1 | ADORA2B | CPB1 |
| AGTR1 | APP | SCARB1 | TACR3 | PTGFR |  |
| MMP2 | CTSB | CMA1 | PDE4A | SCN2A |  |
| MEN1 | CTSK | SLC2A3 | TSPO | CRHR1 |  |
| SLC2A1 | CCR1 | PTGES | RORC | CTSV |  |
| MAPK8 | MAP3K8 | PTPN2 | NMBR | SCN10A |  |
| ABL1 | IDO1 | FKBP1A | GPBAR1 | PDE4B |  |
| BCL2L1 | ADAM17 | BCL2A1 | PABPC1 | MTNR1B |  |
| MAPK14 | TRPC6 | ALOX15 | TRPV1 | PREP |  |

**Appendix C.** **The enrichment chart of GO function analysis of potential targets.**

| Category | GO term | Gene  Ratio | Gene count | FDR |
| --- | --- | --- | --- | --- |
| BP | proteolysis | 19.512195 | 16 | 2.86E-06 |
| apoptotic process | 17.073171 | 14 | 9.55E-05 |
| G protein-coupled receptor signaling pathway | 15.853659 | 13 | 0.017666466 |
| inflammatory response | 14.634146 | 12 | 1.21E-04 |
| response to xenobiotic stimulus | 13.414634 | 11 | 1.94E-05 |
| positive regulation of apoptotic process | 13.414634 | 11 | 9.55E-05 |
| signal transduction | 13.414634 | 11 | 0.286353131 |
| DNA damage response | 8.536585 | 7 | 4.74E-05 |
| immune response | 10.975610 | 9 | 0.033438371 |
| proteolysis | 10.975610 | 9 | 0.033438371 |
| CC | negative regulation of apoptotic process | 62.195122 | 51 | 7.92E-09 |
| plasma membrane | 4.878049 | 4 | 5.31E-05 |
| endolysosome lumen | 4.878049 | 4 | 2.94E-04 |
| Bcl-2 family protein complex | 48.780488 | 40 | 0.001878963 |
| cytosol | 45.121951 | 37 | 0.001884217 |
| membrane | 7.317073 | 6 | 0.003995539 |
| ficolin-1-rich granule lumen | 9.756098 | 8 | 0.005477614 |
| lysosome | 8.536585 | 7 | 0.005477614 |
| mitochondrial outer membrane | 13.414634 | 11 | 0.014902517 |
| perinuclear region of cytoplasm | 4.878049 | 4 | 0.016281596 |
| MF | intercalated disc | 18.292683 | 15 | 0.009871228 |
| identical protein binding | 14.634146 | 12 | 0.09595051 |
| ATP binding | 10.975610 | 9 | 0.293963413 |
| serine-type endopeptidase activity | 10.975610 | 9 | 1.32E-04 |
| G protein-coupled receptor activity | 10.975610 | 9 | 0.089922515 |
| zinc ion binding | 9.756098 | 8 | 0.212268813 |
| peptidase activity | 9.756098 | 8 | 2.62E-05 |
| enzyme binding | 8.536585 | 7 | 0.012711402 |
| endopeptidase activity | 8.536585 | 7 | 7.06E-05 |
| protein serine kinase activity | 8.536585 | 7 | 0.045673013 |

**Appendix D. The enrichment chart of KEGG function analysis of potential targets (Top 20).**

| Category | Term | Gene Ratio | Gene count | FDR |
| --- | --- | --- | --- | --- |
| KEGG PATHWAY | Neuroactive ligand-receptor interaction | 20.731707 | 17 | 3.35E-06 |
| Apoptosis | 18.292683 | 15 | 6.72E-10 |
| Pathways in cancer | 18.292683 | 15 | 0.001096593 |
| Pathways of neurodegeneration - multiple diseases | 17.073171 | 14 | 0.00136807 |
| Diabetic cardiomyopathy | 14.634146 | 12 | 3.36E-05 |
| Lipid and atherosclerosis | 13.414634 | 11 | 2.01E-04 |
| AGE-RAGE signaling pathway in diabetic complications | 12.195122 | 10 | 6.54E-06 |
| Fluid shear stress and atherosclerosis | 12.195122 | 10 | 5.58E-05 |
| Human immunodeficiency virus 1 infection | 12.195122 | 10 | 6.59E-04 |
| Calcium signaling pathway | 12.195122 | 10 | 0.001943447 |
| Inflammatory mediator regulation of TRP channels | 10.975610 | 9 | 4.26E-05 |
| TNF signaling pathway | 10.975610 | 9 | 1.22E-04 |
| Hepatitis B | 10.975610 | 9 | 6.59E-04 |
| cAMP signaling pathway | 10.975610 | 9 | 0.003735964 |
| Coronavirus disease - COVID-19 | 10.975610 | 9 | 0.004588345 |
| Shigellosis | 10.975610 | 9 | 0.005268211 |
| Alzheimer disease | 10.975610 | 9 | 0.038904897 |
| Endocrine resistance | 9.756098 | 8 | 2.66E-04 |
| Toxoplasmosis | 9.756098 | 8 | 5.04E-04 |
| Neurotrophin signaling pathway | 9.756098 | 8 | 6.59E-04 |

**Appendix E. Potential pathways of DEHP toxicity in renal cell carcinoma.**

| **KEGG term** | **Pathways** | Genes |
| --- | --- | --- |
| hsa04080 | Neuroactive ligand-receptor interaction | PTGFR, PTGER1, PTAFR, TACR3, TRPV1, NMBR, CRHR1, P2RX7, GRM5, MTNR1A, GRM4, ADORA2A, MTNR1B, ADORA2B, ADORA1, AGTR1, TSPO |
| hsa04210 | Apoptosis | BCL2A1, BAD, CTSV, CTSS, TNFRSF1A, MAPK8, PIK3CA, CTSL, CASP3, CTSK, BCL2, CAPN1, CTSB, MCL1, BCL2L1 |
| hsa05200 | Pathways in cancer | PTGER1, BAD, MMP2, SLC2A1, PRKCA, MMP9, AR, MAPK8, TERT, PIK3CA, CASP3, BCL2, ABL1, AGTR1, BCL2L1 |
| hsa05022 | Pathways of neurodegeneration - multiple diseases | APP, VCP, TRPC3, BAD, PRKCA, MAPK14, TNFRSF1A, MAPK11, GRM5, MAPK8, CASP3, BCL2, CAPN1, BCL2L1 |
| hsa05415 | Diabetic cardiomyopathy | MAPK11, MAPK8, ACE, PIK3CA, CMA1, MMP2, PRKCD, SLC2A1, AGTR1, PRKCA, MAPK14, MMP9 |
| hsa05417 | Lipid and atherosclerosis | MAPK11, MAPK8, PIK3CA, BAD, CASP3, BCL2, PRKCA, MAPK14, MMP9, BCL2L1, TNFRSF1A |
| hsa04933 | AGE-RAGE signaling pathway in diabetic complications | MAPK11, MAPK8, PIK3CA, CASP3, MMP2, PRKCD, BCL2, AGTR1, PRKCA, MAPK14 |
| hsa05418 | Fluid shear stress and atherosclerosis | MAPK11, MAPK8, PIK3CA, CTSL, MMP2, TRPV4, BCL2, MAPK14, MMP9, TNFRSF1A |
| hsa05170 | Human immunodeficiency virus 1 infection | MAPK11, MAPK8, PIK3CA, BAD, CASP3, BCL2, PRKCA, MAPK14, BCL2L1, TNFRSF1A |
| hsa04020 | Calcium signaling pathway | P2RX7, PTGFR, GRM5, ADORA2A, PTGER1, ADORA2B, PTAFR, AGTR1, TACR3, PRKCA |
| hsa04750 | Inflammatory mediator regulation of TRP channels | MAPK11, MAPK8, PIK3CA, TRPA1, TRPV4, PRKCD, PRKCA, TRPV1, MAPK14 |
| hsa04668 | TNF signaling pathway | MAPK11, ADAM17, MAPK8, PIK3CA, CASP3, MAP3K8, MAPK14, MMP9, TNFRSF1A |
| hsa05161 | Hepatitis B | MAPK11, MAPK8, PIK3CA, BAD, CASP3, BCL2, PRKCA, MAPK14, MMP9 |
| hsa04024 | cAMP signaling pathway | MAPK8, PDE10A, ADORA2A, PIK3CA, BAD, ADORA1, PDE4B, PDE4A, CRHR1 |

**Appendix F. The molecular interactions and pathways of core targets gene.**

**(Data Sources: https://en.wikipedia.org/wiki)**

| **Gene symbol** | **Full name** | **Function and pathway involvement** | **Potential role in cancer development** |
| --- | --- | --- | --- |
| BCL2 | B-cell CLL/lymphoma 2 | Anti-apoptotic, regulates cell death by controlling mitochondrial membrane permeability, implicated in a variety of cancers​ | BCL2 is crucial for regulating apoptosis and is often overexpressed in various cancers, contributing to resistance to therapy and cell survival. |
| CASP3 | Caspase 3 | Plays a crucial role in apoptosis, involved in the cleavage of cellular proteins, participates in neuroprotective mechanisms​ | Plays a key role in the execution phase of cell apoptosis, important in the elimination of cancer cells. |
| MMP9 | Matrix metallopeptidase 9 | Involved in the breakdown of extracellular matrix, role in tissue remodeling and disease processes such as cancer​ | Facilitates cancer metastasis and progression through degradation of the extracellular matrix. |
| BCL2L1 | BCL2-like 1 | Functions similarly to BCL2, involved in controlling apoptosis and cell survival, important in cancer biology | Similar to BCL2, supports cell survival and is implicated in apoptosis resistance in cancer cells. |
| CTSS | Cathepsin S | Involved in protein degradation within lysosomes, plays roles in immune system functioning and potentially in cancer progression​ | the loss of cathepsin S led to impaired tumor vascularization, which was complemented by a reduction in proliferation and increased apoptosis, consistent with reduced tumor growth; cathepsin S as a therapeutic target in cancer |
| APP | Amyloid beta precursor protein | Implicated in Alzheimer’s disease, cleavage results in beta-amyloid formation, also has roles in signaling and cell adhesion​ | Predominantly studied in Alzheimer's disease context but also involved in signaling affecting cancer cell growth and survival. |
