# Supplementary material for: Toxicity and mechanistic analysis of Di(2- ethylhexyl)phthalate in renal cell carcinoma Progression: a systematic study with network toxicology and molecular docking strategies
Source: Research Square preprint supplement (doi:10.21203/rs.3.rs-5804717/v1), 2025-04-28
Supplement: Supplementary file 5 [file b7004f47fb0d682d0d034405.docx]

**Table 3. Molecular docking results of core target protein with the DEHP (Detail).**

| **Gene** | **PDB ID** | **CurPock ID** | **Vina score** | **Cavity volume** | **Center**  **(x,y,z)** | **Docking size (x,y,z)** | **Contact**  **residues** |
| --- | --- | --- | --- | --- | --- | --- | --- |
| CASP3 | 1GFW | C2 | -6.2 | 284 | 37, 35, 32 | 23, 23, 23 | **Chain A**: MET61 THR62 SER63 SER65 HIS121 GLY122 GLU123 CYS163 GLY165 THR166 LEU168 **Chain B**: TYR204 SER205 TRP206 ARG207 ASN208 SER209 SER249 PHE250 SER251 PHE252 ASP253 PHE256 |
| C4 | -6.0 | 130 | 42, 24, 26 | 23, 23, 23 | **Chain A**: THR62 SER63 SER65 HIS121 CYS163 LEU168 **Chain B**: TYR204 SER205 TRP206 ARG207 ASN208 SER209 TRP214 GLU248 SER249 PHE250 SER251 PHE252 ASP253 PHE256 |
| C1 | -5.4 | 392 | 11, 29, 45 | 23, 23, 23 | **Chain A**: ARG101 SER104 LYS105 ASP135 LYS137 LYS138 ILE139 ASN141 PHE142 ASP146 ARG147 |
| C5 | -5.0 | 110 | 27, 31, 48 | 23, 23, 23 | **Chain A**: GLU124 GLY125 ASP135 LEU136 LYS137 THR140 ARG164 **Chain B**: TYR195 TYR197 PRO201 CYS264 ILE265 VAL266 SER267 MET268 |
| BCL2 | 1G5M | C4 | -5.8 | 221 | -10, -4, -1 | 23, 23, 23 | **Chain A**: ARG12 GLU13 ILE14 MET16 LYS17 TYR18 HIS20 TYR21 SER24 TRP30 ASP31 ALA32 ASP35 VAL36 GLU37 GLU38 ASN39 ARG40 THR41 GLU42 HIS94 ARG98 |
| C5 | -5.6 | 130 | 9, 8, -6 | 23, 23, 23 | **Chain A**: ALA96 GLN99 ALA100 GLY101 ASP103 PHE104 ARG107 TYR108 TRP144 GLY145 ARG146 VAL148 LEU201 TYR202 GLY203 PRO204 |
| C3 | -5.2 | 285 | -1, 6, 10 | 23, 23, 23 | **Chain A**: HIS3 ALA4 GLY5 ARG6 THR7 GLY8 TYR9 ASP10 ASN11 ILE14 LEU181 ASN182 HIS186 ILE189 GLN190 GLY193 GLY194 TRP195 ASP196 |
| MMP9 | 1ITV | C5 | -5.3 | 211 | -41, -29, 1 | 23, 23, 23 | **Chain A**: ALA13 GLU14 GLY16 ASN17 VAL58 PHE59 GLU60 PRO62 LYS65 ALA104 LEU105 ARG106 SER107 GLY108 ARG109 MET112 LEU113 MET141 PHE142 GLN154 ARG156 GLU157 LYS158 ALA159 VAL170 SER171 SER172 ASN177 |
| C2 | -5.0 | 495 | -36, -53, -14 | 23, 23, 23 | **Chain A**: CYS4 ASN5 VAL6 ASN7 ARG165 PHE166 TYR184 THR186 TYR187 CYS192 PRO193 ASP195 **Chain B**: TYR167 GLN181 VAL182 GLY183 TYR184 TYR187 ASP188 GLU194 |
| BCL2L1 | 4CIN | C2 | -6.6 | 589 | -63, 7, 20 | 23, 23, 23 | **Chain A**: LYS16 GLN19 LYS20 **Chain B**: PHE97 GLU98 TYR101 ARG102 HIS113 ILE114 SER122 VAL126 SER145 PHE146 GLY148 ALA149 LEU150 VAL152 GLU153 ASP156 **Chain D**: MET5 VAL8 LEU12 |
| C3 | -5.9 | 366 | -43, 17, -15 | 23, 23, 23 | **Chain A**: ASP95 GLU98 LEU99 TYR101 ARG102 PHE105 SER106 THR109 SER145 GLY148 ALA149 VAL152 GLU153 ASP156 **Chain B**: LYS16 GLN19 LYS20 |
| C1 | -5.7 | 4169 | -52, 13, 3 | 33, 33, 23 | **Chain A**: GLU7 VAL10 ASP11 SER14 TYR15 SER18 GLN19 TRP24 MET83 ALA84 LYS87 GLN88 ARG91 GLU92 ASP95 **Chain B**: ARG6 GLU7 VAL10 ASP11 SER14 TYR15 SER18 GLN19 TRP24 SER25 MET83 ALA84 LYS87 GLN88 ARG91 GLU92 ASP95 |
| C5 | -5.4 | 148 | -49, 14, 19 | 23, 23, 23 | **Chain A**: ARG6 GLU7 VAL10 ASP11 SER14 LEU17 GLY21 TYR22 SER23 TRP24 SER25 MET83 ALA84 LYS87 ARG91 **Chain B**: GLU7 ASP11 LYS87 ARG91 VAL155 GLU158 GLN160 VAL161 VAL163 SER164 |
| CTSS | 1GLO | C1 | -6.5 | 637 | 2, 36, 24 | 23, 23, 23 | **Chain A**: GLY23 SER25 TRP26 GLY62 ASN63 LYS64 ASN67 GLY68 GLY69 PHE70 MET71 THR72 THR73 GLU115 VAL136 GLY137 VAL138 ARG141 VAL162 ASN163 HIS164 GLY165 PHE211 PRO212 SER213 |
| C3 | -5.8 | 184 | -13, 39, 11 | 23, 23, 23 | **Chain A**: TYR18 GLN19 GLY20 SER21 CYS22 GLY23 ALA24 SER25 CYS66 ALA140 ARG141 HIS142 PRO143 PHE146 LEU147 ARG149 ASN163 HIS164 GLY165 TRP186 ASN189 PHE190 |
| APP | 1AAP | C1 | -5.9 | 2185 | 16, 18, 37 | 23, 23, 23 | **Chain A**: GLN8 ALA9 THR11 TYR22 ASP24 VAL25 THR26 GLU27 PRO32 PHE33 PHE34 **Chain B**: GLN8 ALA9 GLU10 THR11 TYR22 ASP24 VAL25 THR26 GLU27 ALA31 PRO32 PHE33 PHE34 |
| C2 | -5.1 | 864 | 21, 21, 36 | 23, 23, 23 | **Chain A**: ARG2 GLU3 VAL4 SER6 GLU7 GLY40 ASN41 ARG42 **Chain B**: VAL1 GLU3 VAL4 SER6 GLU7 GLN8 GLU10 GLY40 ASN41 ARG42 |
