# Supplementary figures and images for: Toxicity and mechanistic analysis of Di(2- ethylhexyl)phthalate in renal cell carcinoma Progression: a systematic study with network toxicology and molecular docking strategies
Source: Research Square preprint supplement (doi:10.21203/rs.3.rs-5804717/v1), 2025-04-28

CASP3


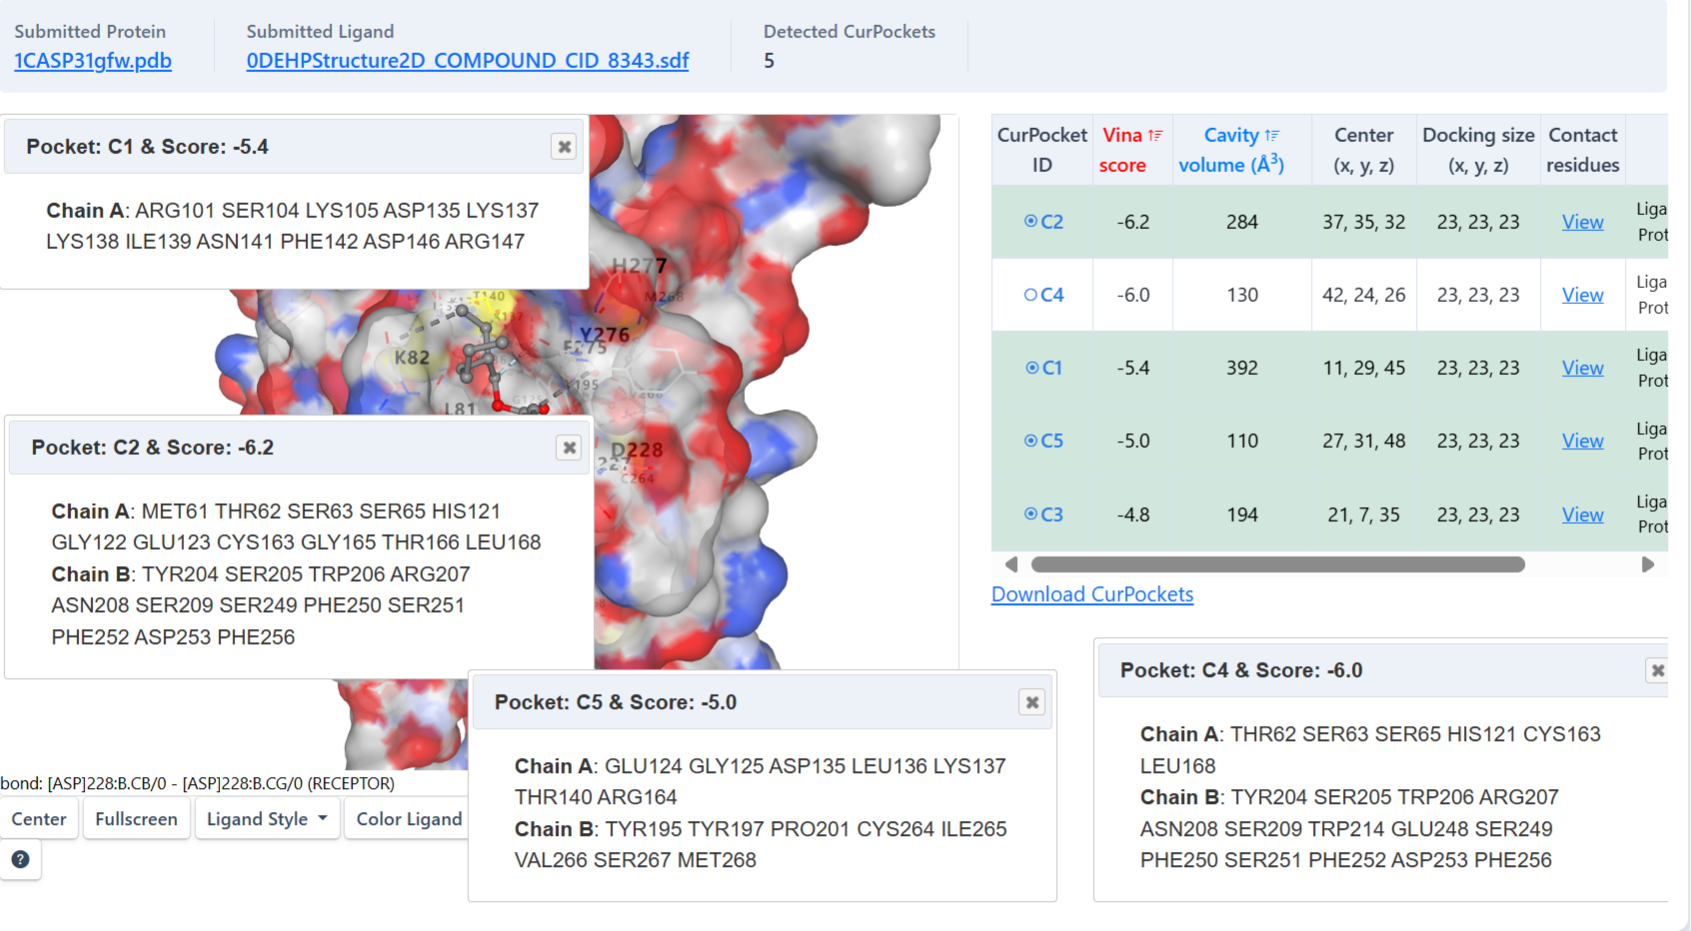


BCL1


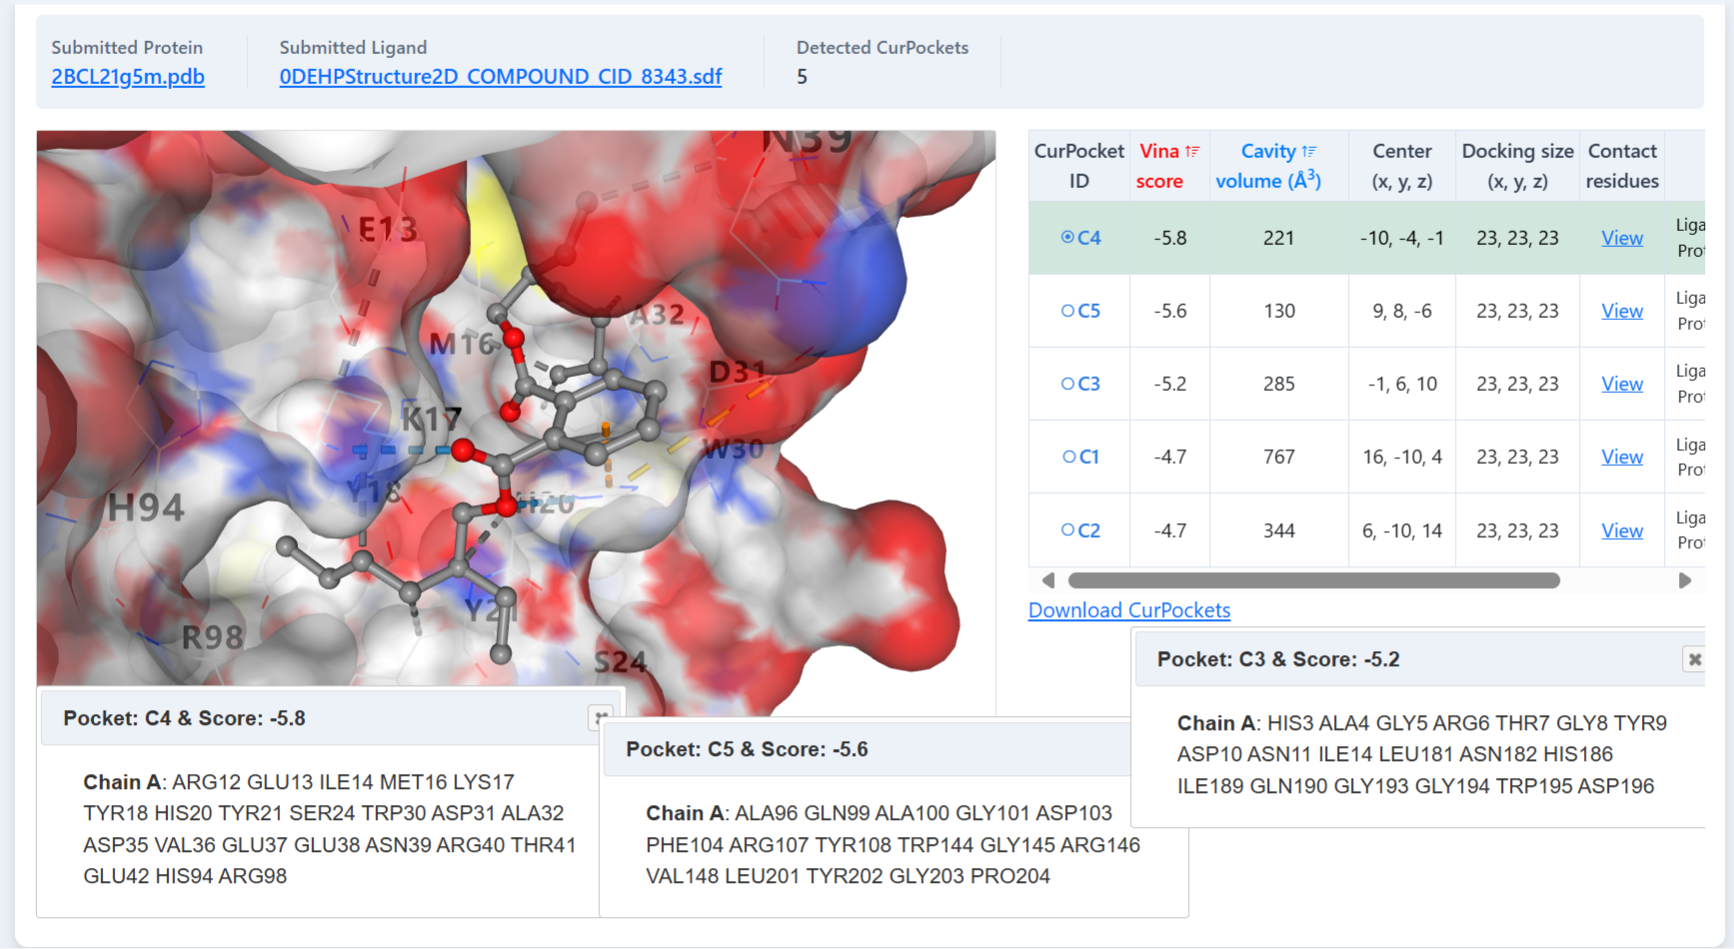


MMP9


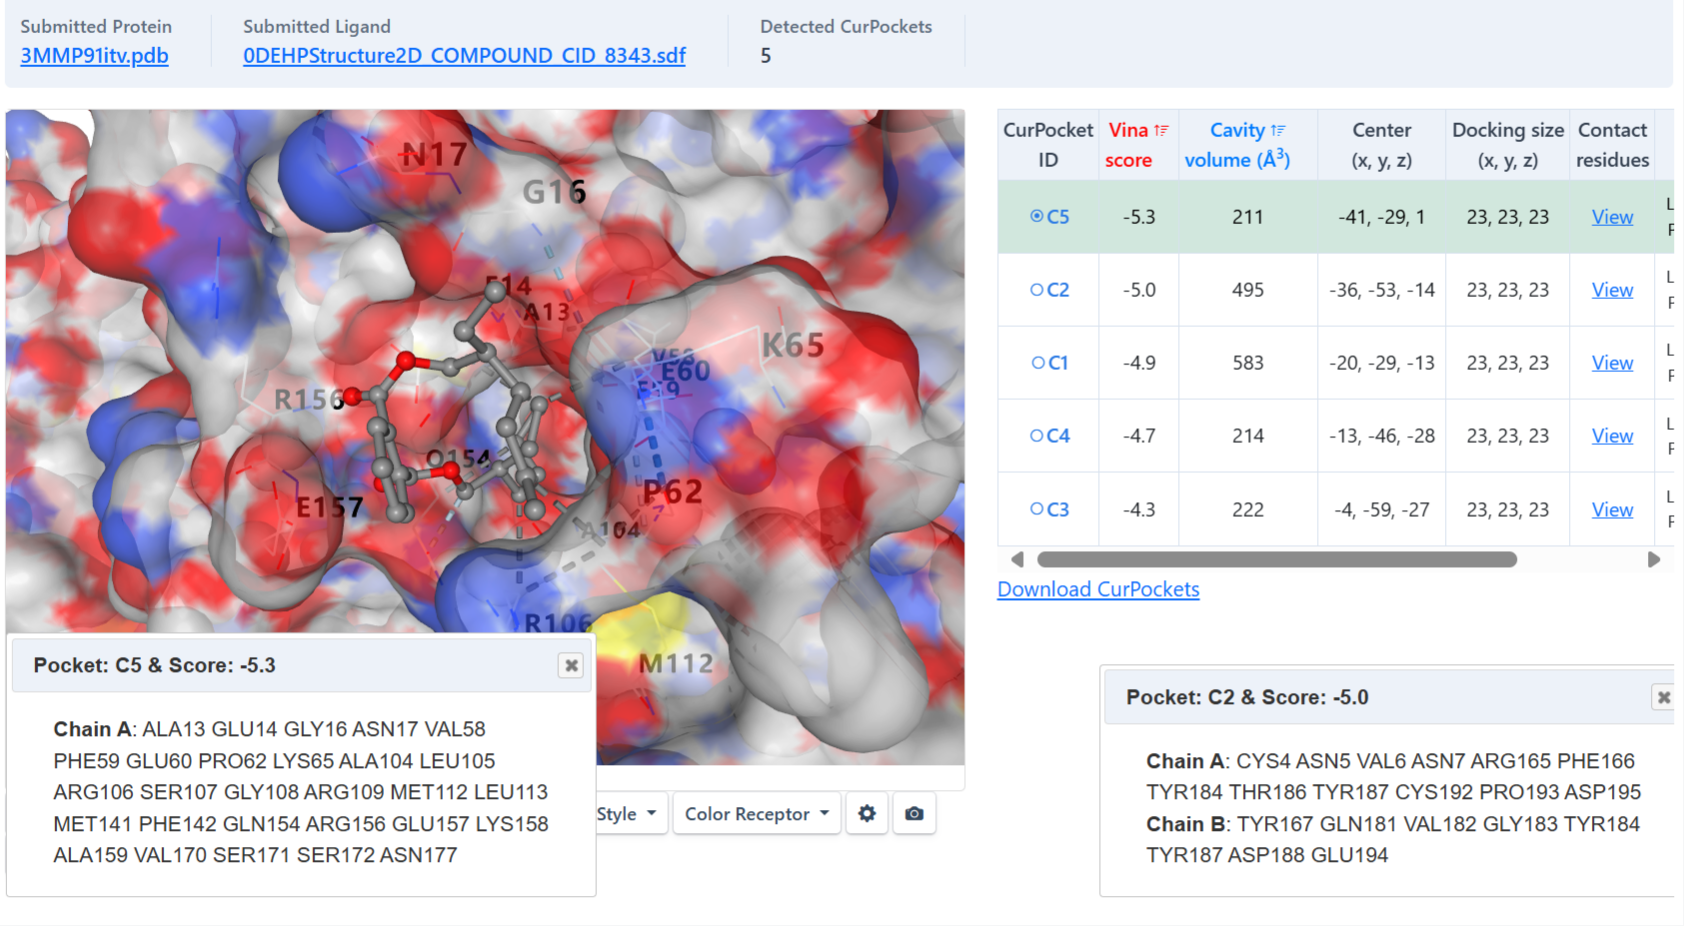


BCL2L1


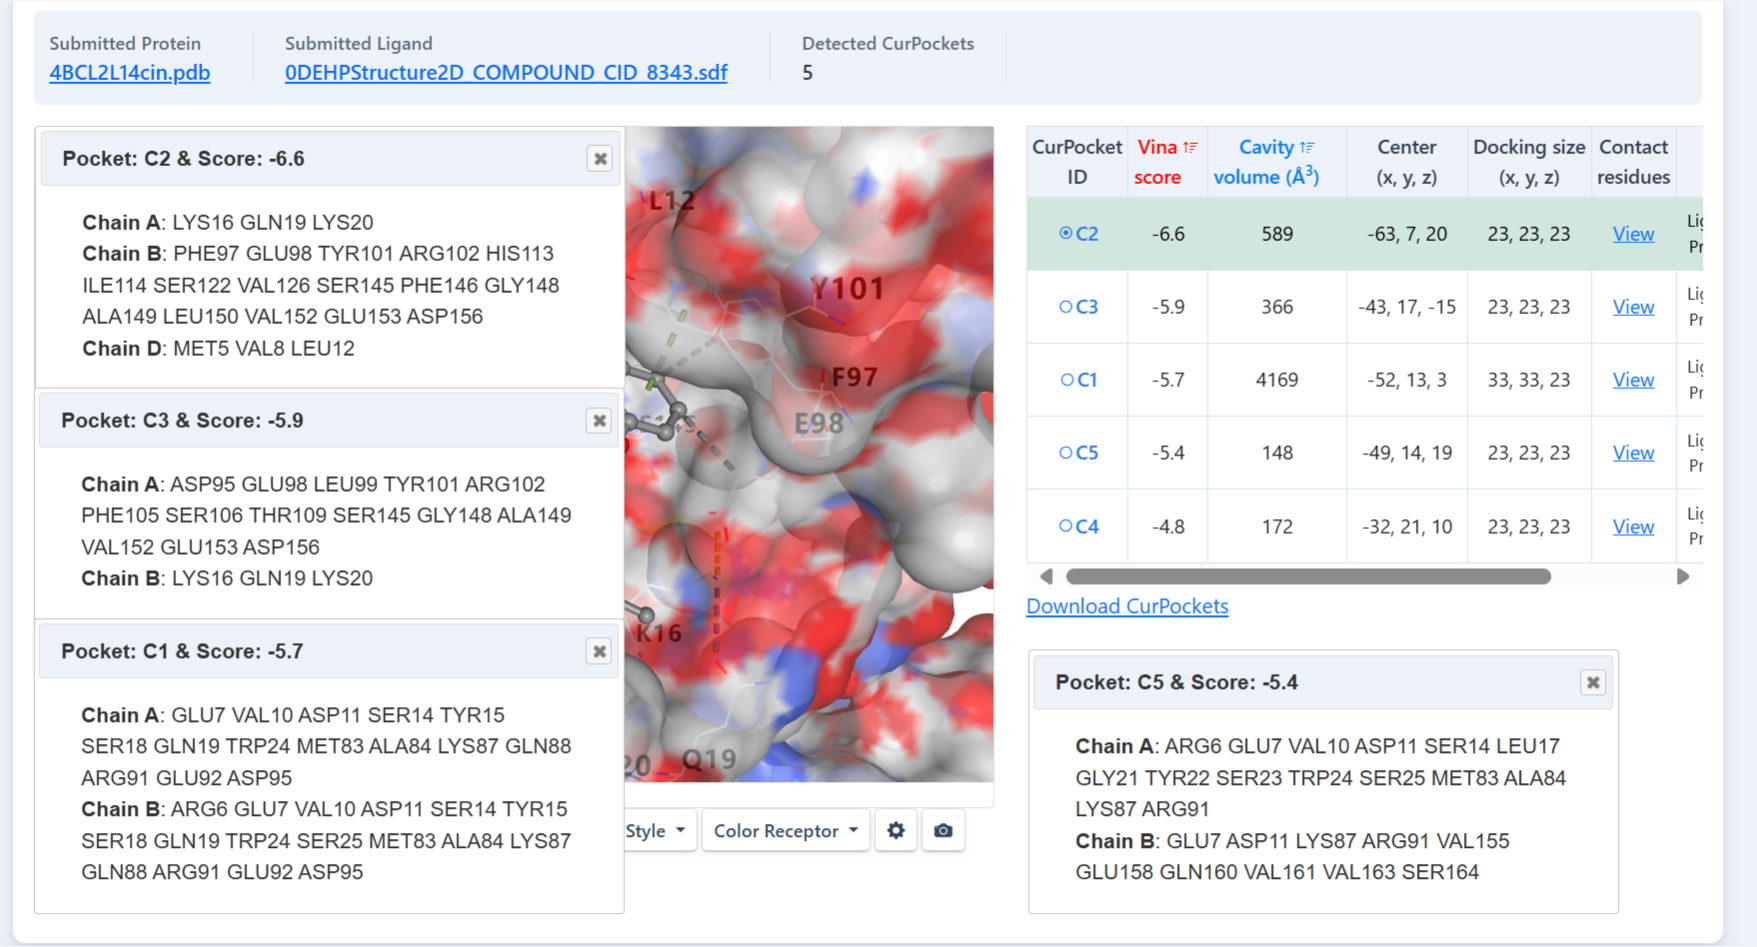


CTSS


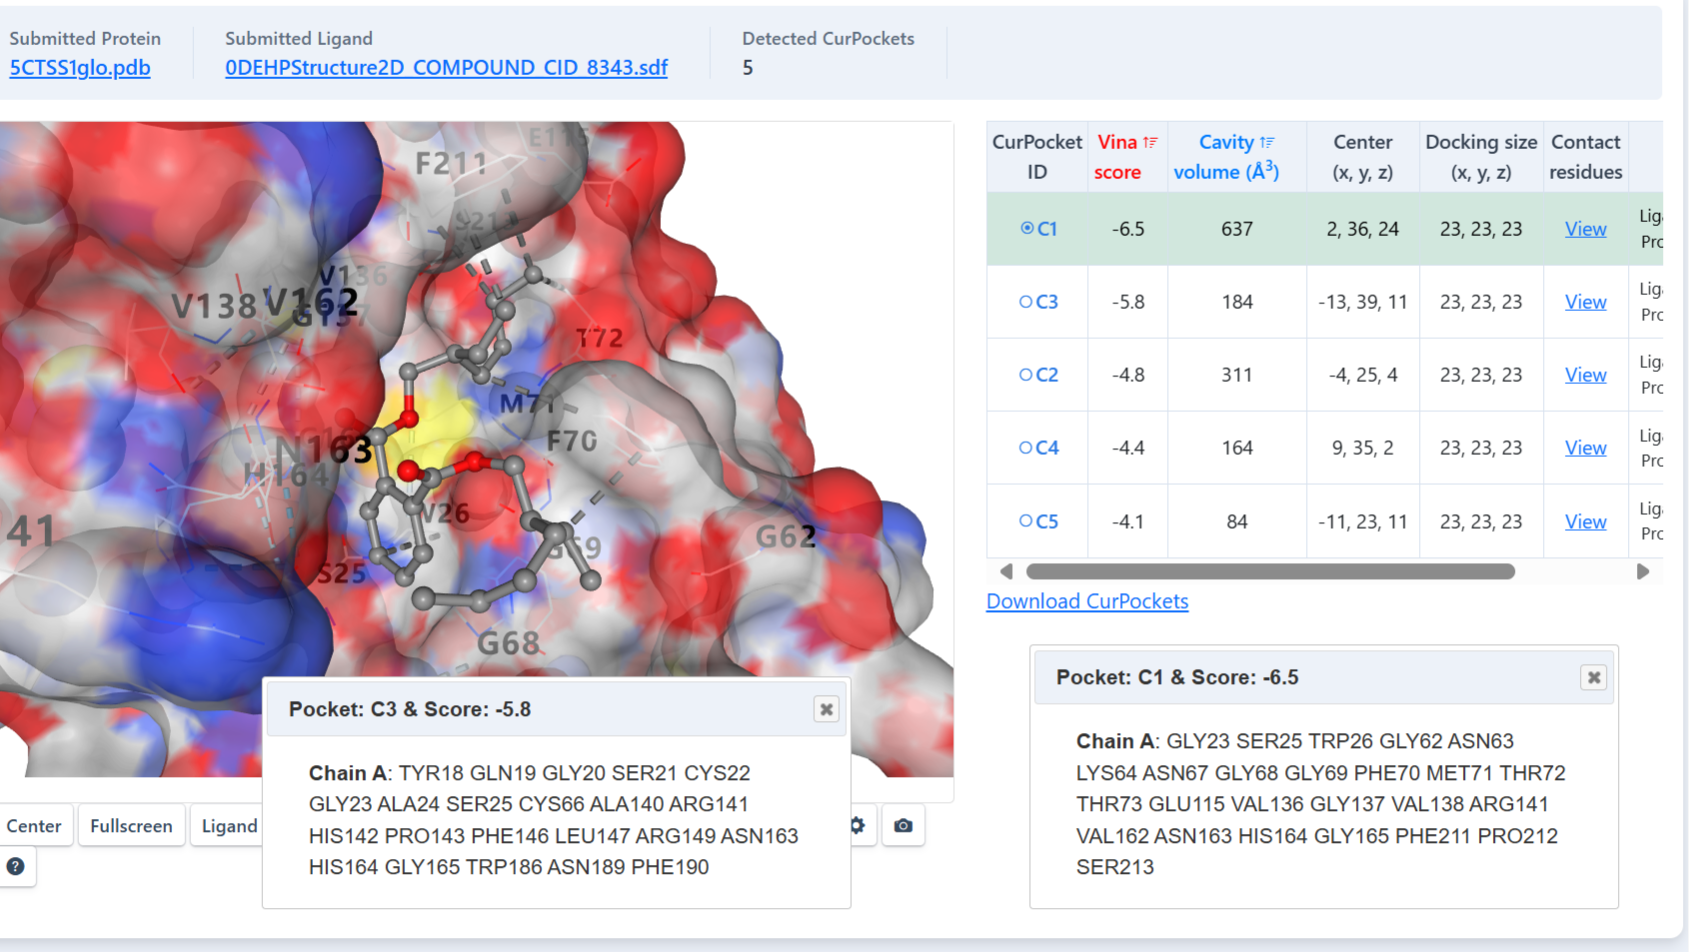


App


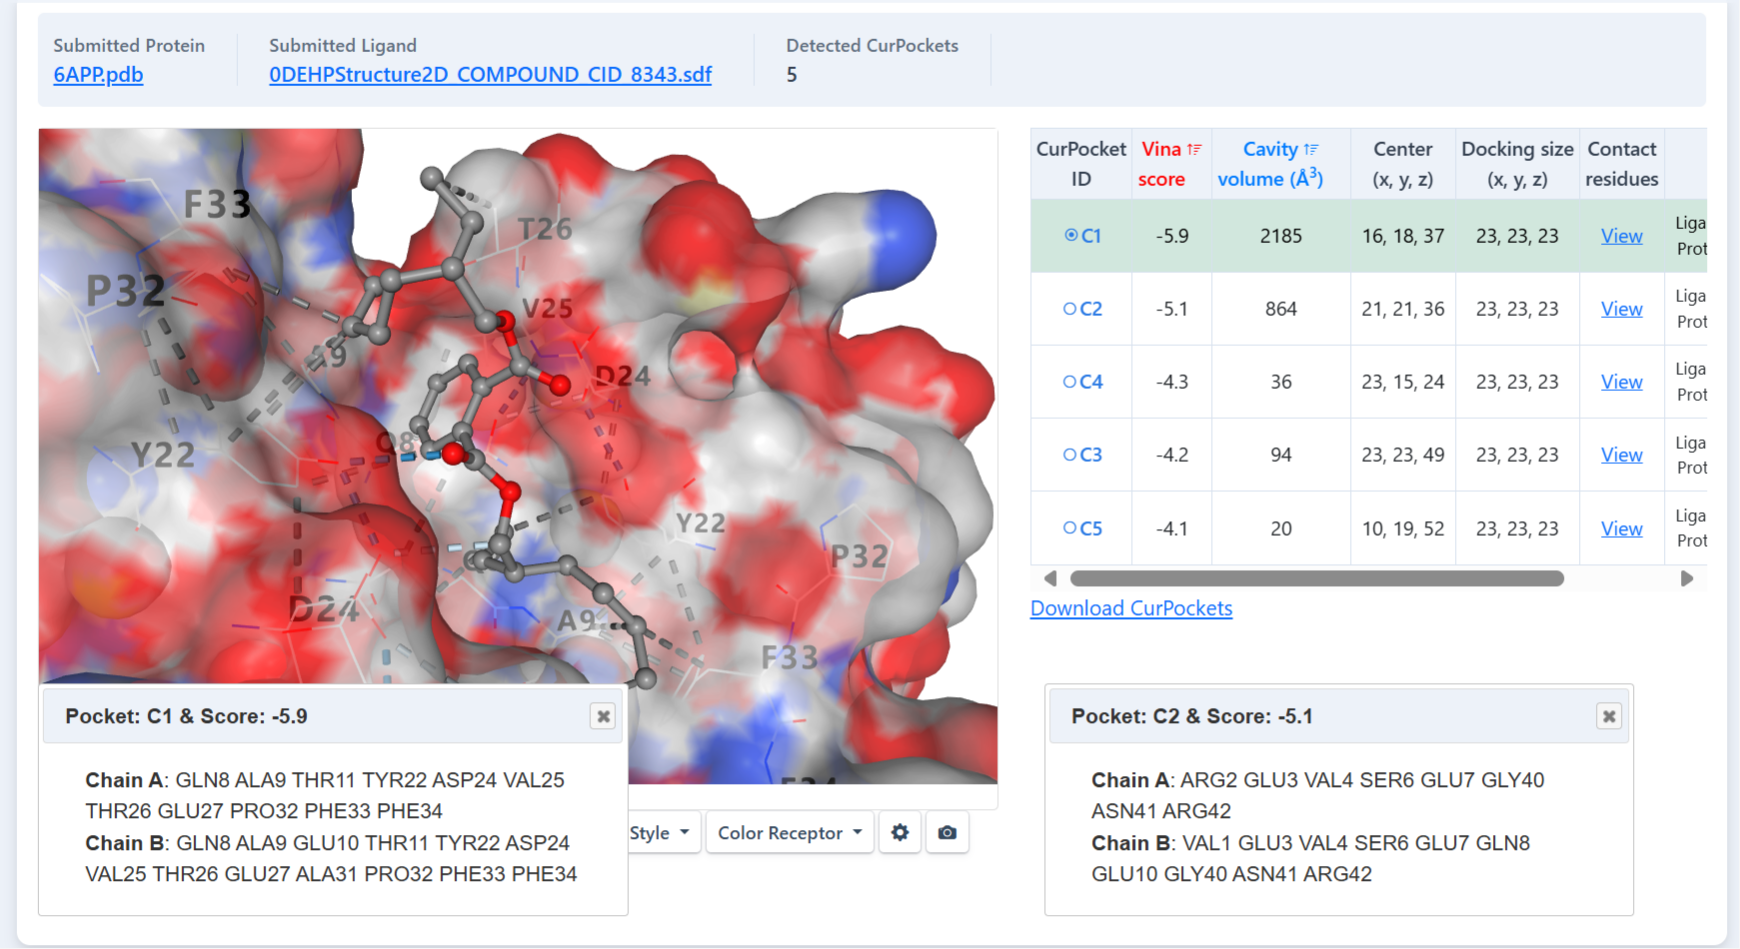

Supplement: Supplementary file 6 [file e16cb42ab2de914981c91798.docx]
